# Supplementary material for: An evolutionary roadmap to the microtubule-associated protein MAP Tau
Source: PubMed Central journal article supplement (PMC4815063; doi:10.1186/s12864-016-2590-9), 2016-03-31

Exon 5 87 aa/262 bp

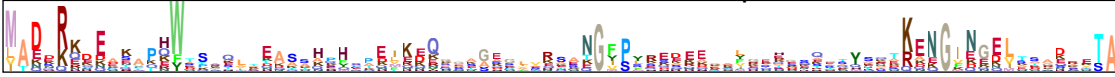

Exon 6 38 aa/114 bp

Exon 7 26 aa/78 bp

Exon 8 83 aa/246 bp

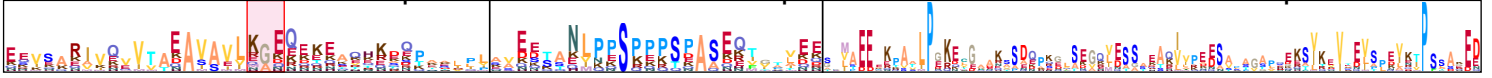

Exon 9 1242 aa/3726 bp

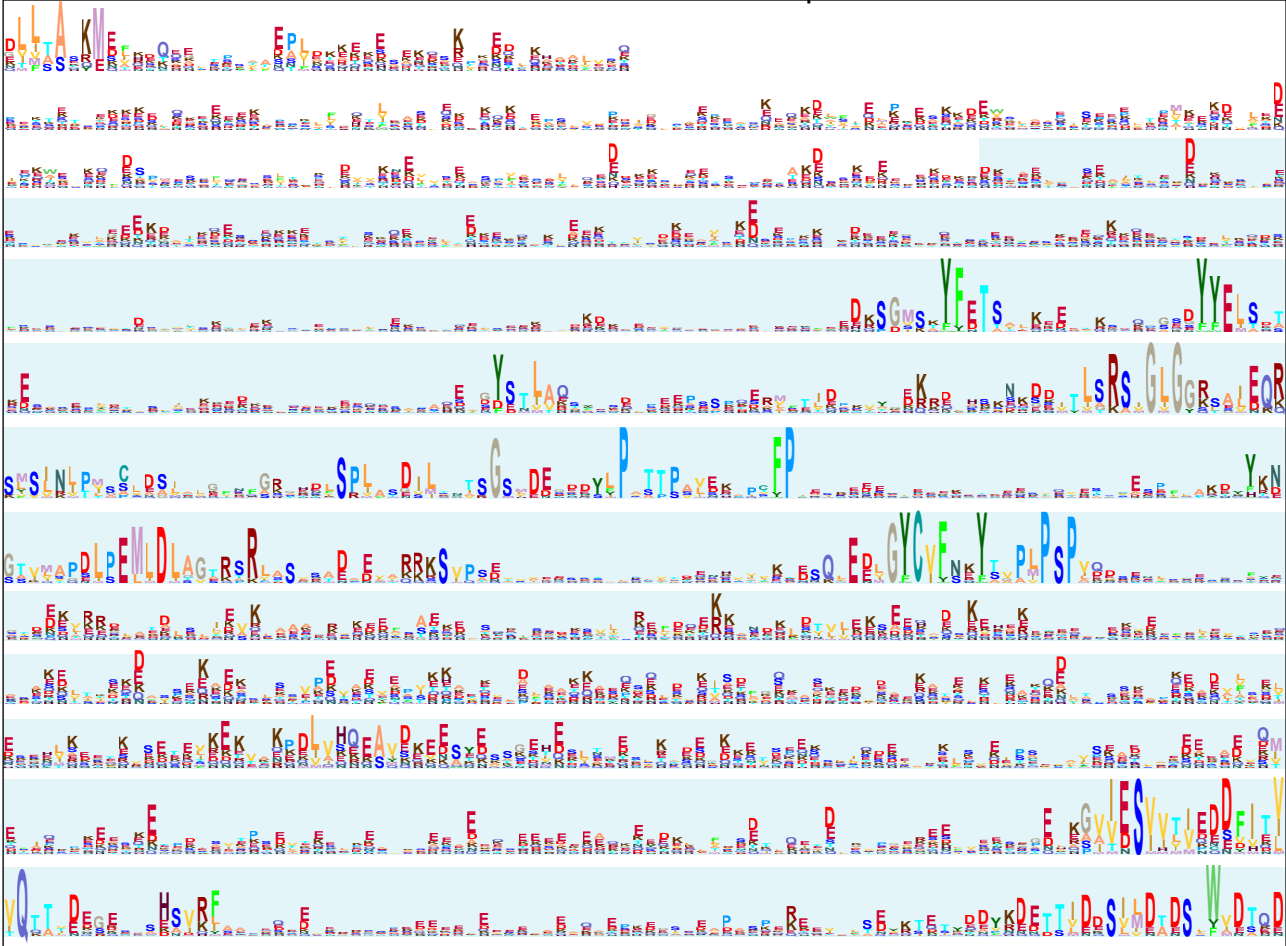

Exon 10 69 aa/207 bp

Exon 11 45 aa/135 bp

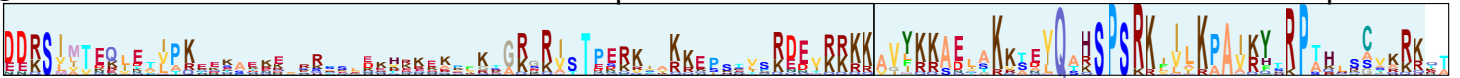

Exon 12 21 aa/62 bp

Exon 13 57 aa/171 bp

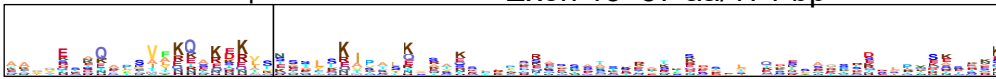

Exon 14 49 aa/148 bp

Exon 15 114 aa/341 bp

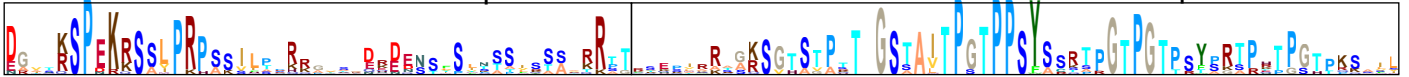

... Exon 16 114 aa/341 bp

Exon 17 31 aa/93 bp

Exon 16 27 aa/82 bp

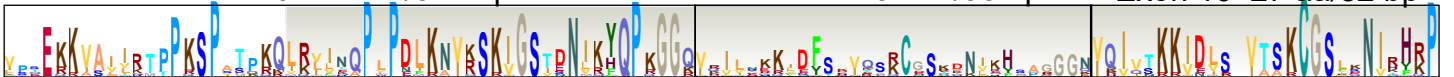

Exon 18 38 aa/113 bp

Exon 19 71 aa/213 bp

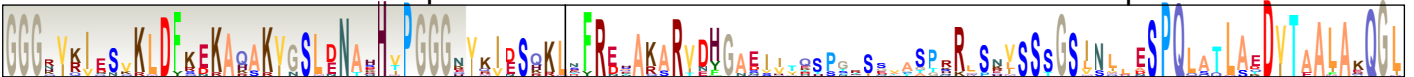

Supplement: 12864_2016_2590_MOESM2_ESM.pdf [file 12864_2016_2590_MOESM2_ESM.pdf]
