# Supplementary material for: An evolutionary roadmap to the microtubule-associated protein MAP Tau
Source: PubMed Central journal article supplement (PMC4815063; doi:10.1186/s12864-016-2590-9), 2016-03-31

Exon 2 - 74 aa/223 bp

① Exon 3 - 23 aa/69 bp

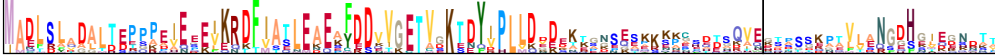

① Exon 4 - 41 aa/123 bp

① Exon 5 - 38 aa/114 bp

① Exon 6 - 41 aa/123 bp

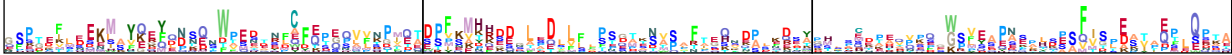

① Exon 7 - 408 aa/1224 bp

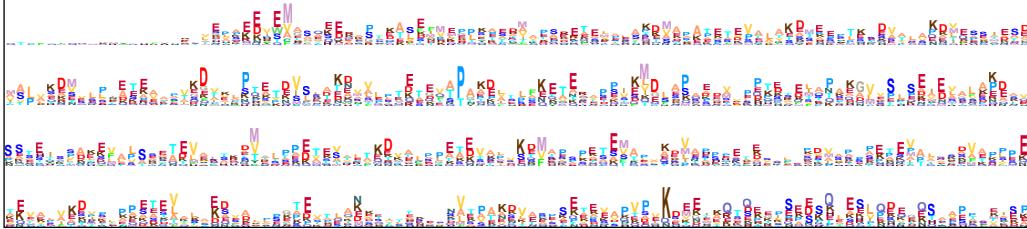

① Exon 8 - 41 aa/123 bp

① Exon 9 - 36 aa/107 bp

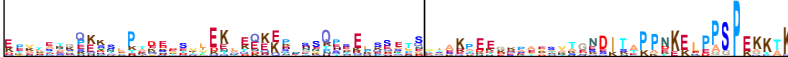

① Exon 10 - 72 aa/216 bp

① Exon 11 - 61 aa/184 bp

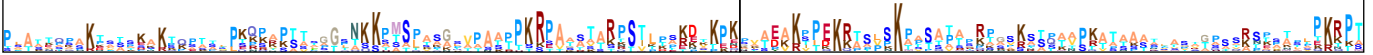

① Exon 12 - 20 aa/60 bp ① Exon 13 - 98 aa/293 bp

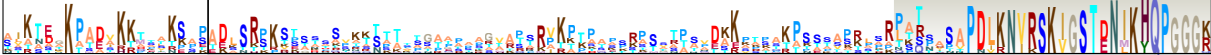

① Exon 14 - 38 aa/114 bp

① Exon 15 - 31 aa/93 bp

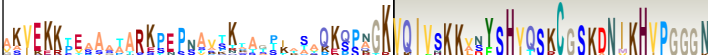

① Exon 16 - 27 aa/82 bp ① Exon 17 - 38 aa/113 bp

① Exon 18 - 63 aa/190 bp

Exon 19 - 1 aa/5 bp ①

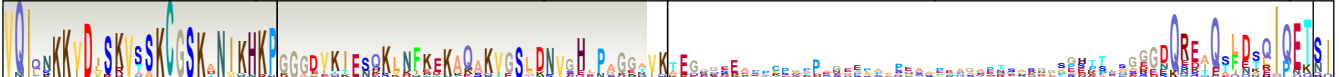

Supplement: 12864_2016_2590_MOESM3_ESM.pdf [file 12864_2016_2590_MOESM3_ESM.pdf]
