# Supplementary material for: An evolutionary roadmap to the microtubule-associated protein MAP Tau
Source: PubMed Central journal article supplement (PMC4815063; doi:10.1186/s12864-016-2590-9), 2016-03-31

## Mammalian MAPT subHMM logos

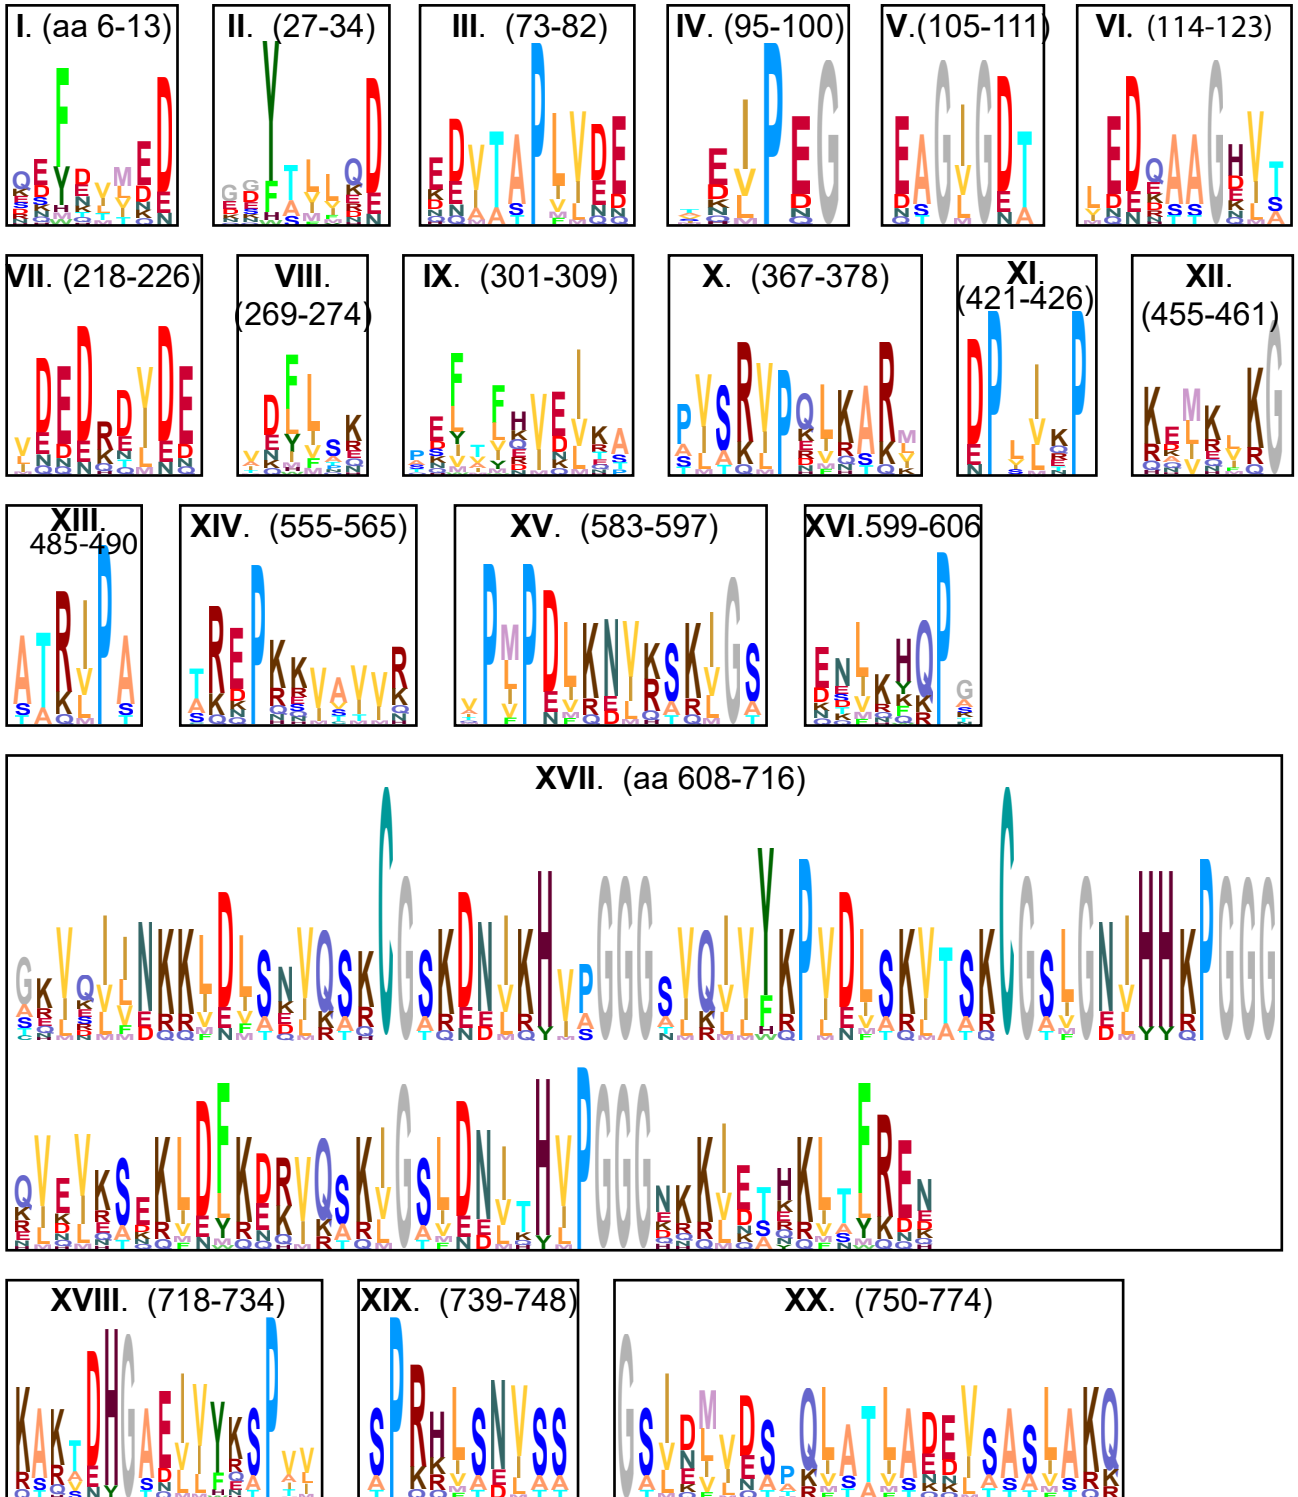

Supplement: 12864_2016_2590_MOESM4_ESM.pdf [file 12864_2016_2590_MOESM4_ESM.pdf]
